# Supplementary material for: Habitat Suitability and Determinants for Anatidae in Multi-Watershed Composite Wetlands in Anhui, China
Source: MDPI journal article supplement (doi:10.3390/ani14071010), 2024-03-26
Supplement: s1 [file s1]

**Table S2.** Variables retained from the final modelling for each species.

| Species                   | Reserved variables                                                                  |
|---------------------------|-------------------------------------------------------------------------------------|
| <i>Cygnus columbianus</i> | bio1, bio5, bio8, bio13, bio14, bio15, bio16, bio17, bio18, bio19, LU, HF, DF, DEM  |
| <i>Anser cygnoid</i>      | bio1, bio5, bio13, bio14, bio15, bio16, bio17, bio18, bio19, LU, POP, DF, CD        |
| <i>Anser fabalis</i>      | bio1, bio5, bio8, bio13, bio14, bio15, bio16, bio17, bio18, bio19, LU, DF, DEM      |
| <i>Anser albifrons</i>    | bio1, bio5, bio10, bio13, bio14, bio15, bio16, bio17, bio18, bio19, DEM, HF, DF, CD |
| <i>Anser erythropus</i>   | bio2, bio5, bio13, bio14, bio15, bio16, bio17, bio18, bio19, LU, POP, DF, RD        |
| <i>Anser anser</i>        | bio1, bio5, bio8, bio13, bio14, bio15, bio16, bio17, bio18, bio19, POP, DF, RD, CD  |
| <i>Tadorna ferruginea</i> | bio1, bio5, bio13, bio14, bio15, bio16, bio17, bio18, bio19, LU, HF, DEM            |
| <i>Tadorna tadorna</i>    | bio1, bio5, bio13, bio14, bio15, bio16, bio17, bio18, bio19, LU, DEM, RD            |
| <i>Mareca penelope</i>    | bio1, bio5, bio13, bio14, bio15, bio16, bio17, bio18, bio19, LU, HF, RD             |
| <i>Mareca falcata</i>     | bio1, bio5, bio13, bio14, bio15, bio16, bio17, bio18, bio19, LU, POP, DF            |
| <i>Mareca strepera</i>    | bio1, bio5, bio13, bio14, bio15, bio16, bio17, bio18, bio19, LU, DEM, CD            |
| <i>Anas crecca</i>        | bio1, bio5, bio13, bio14, bio15, bio16, bio17, bio18, bio19, LU, HF, DF, DEM        |
| <i>Anas platyrhynchos</i> | bio5, bio13, bio14, bio15, bio16, bio17, bio18, bio19, LU, DEM, POP, DF             |
| <i>Anas zonorhyncha</i>   | bio5, bio13, bio14, bio15, bio16, bio17, bio18, bio19, LU, HF, POP, DF              |
| <i>Anas acuta</i>         | bio1, bio5, bio13, bio14, bio15, bio16, bio17, bio18, bio19, LU, DEM, RD            |
| <i>Spatula clypeata</i>   | bio1, bio5, bio13, bio14, bio15, bio16, bio17, bio18, bio19, RD, HF, CD, DEM        |
| <i>Aythya ferina</i>      | bio1, bio5, bio13, bio14, bio15, bio16, bio17, bio18, bio19, LU, DEM, RD            |
| <i>Aythya baeri</i>       | bio1, bio5, bio8, bio13, bio14, bio15, bio16, bio17, bio18, bio19, LU, HF, DF       |
| <i>Aythya fuligula</i>    | bio1, bio5, bio13, bio14, bio15, bio16, bio17, bio18, bio19, LU, POP, DF, DEM       |
| <i>Mergus squamatus</i>   | bio1, bio5, bio8, bio13, bio14, bio15, bio16, bio17, bio18, bio19, LU, DF, RD       |
| <i>Mergus merganser</i>   | bio1, bio5, bio10, bio13, bio14, bio15, bio16, bio17, bio18, bio19, DEM, HF, DF     |

bio1 – 19: 19 bioclimatic variables, DEM: digital elevation model, HF: human footprint, DF: distribution of farmland, POP: population data, CD: distance to countryside, RD: distance to road.
