# Supplementary material for: Habitat Suitability and Determinants for Anatidae in Multi-Watershed Composite Wetlands in Anhui, China
Source: MDPI journal article supplement (doi:10.3390/ani14071010), 2024-03-26
Supplement: s1 [file s1]

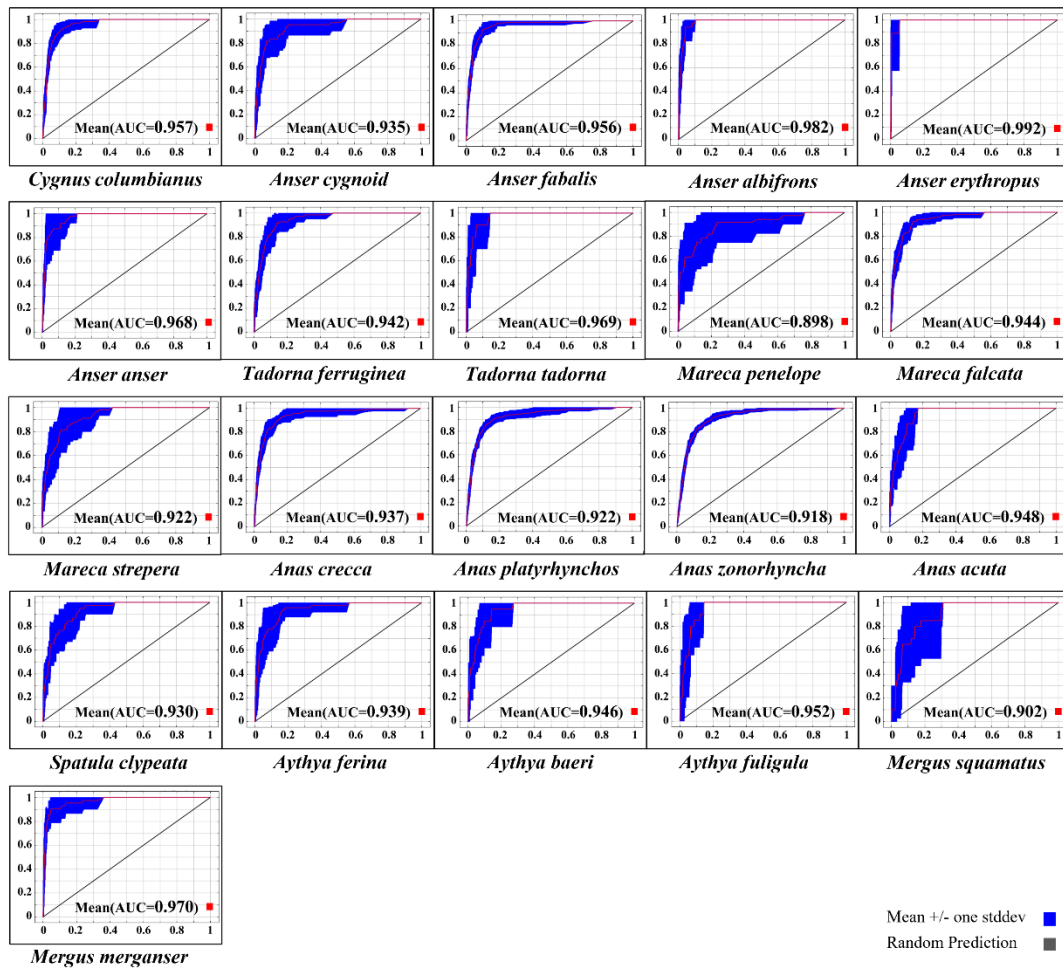

Figure S1. ROC curve and AUC values for 21 Anatidae species from MaxEnt models.

X: Fractional Predicted Area, Y: Sensitivity
