# Supplementary material for: Habitat Suitability and Determinants for Anatidae in Multi-Watershed Composite Wetlands in Anhui, China
Source: MDPI journal article supplement (doi:10.3390/ani14071010), 2024-03-26
Supplement: s1 [file s1]

**Table S1.** Environmental variables for MaxEnt and GLMM models.

| Category          | Code  | Description                         | Source                                                                        |
|-------------------|-------|-------------------------------------|-------------------------------------------------------------------------------|
| Climate variables | bio1  | Annual mean temperature             | WorldClim                                                                     |
|                   | bio2  | Mean diurnal rang                   |                                                                               |
|                   | bio3  | Isothermality                       |                                                                               |
|                   | bio4  | Temperature seasonality             |                                                                               |
|                   | bio5  | Max temperature of warmest month    |                                                                               |
|                   | bio6  | Min temperature of coldest month    |                                                                               |
|                   | bio7  | Temperature annual range            |                                                                               |
|                   | bio8  | Mean temperature of wettest quarter |                                                                               |
|                   | bio9  | Mean temperature of driest quarter  |                                                                               |
|                   | bio10 | Mean temperature of warmest quarter |                                                                               |
|                   | bio11 | Mean temperature of coldest quarter |                                                                               |
|                   | bio12 | Annual precipitation                |                                                                               |
|                   | bio13 | Precipitation of wettest month      |                                                                               |
|                   | bio14 | Precipitation of driest month       |                                                                               |
|                   | bio15 | Precipitation seasonality           |                                                                               |
|                   | bio16 | Precipitation of wettest quarter    |                                                                               |
|                   | bio17 | Precipitation of driest quarter     |                                                                               |
|                   | bio18 | Precipitation of warmest quarter    |                                                                               |
|                   | bio19 | Precipitation of coldest quarter    |                                                                               |
| Land use          | LU    | Land use/cover                      | Resource and Environment Science and Data Center                              |
|                   | DF    | Distribution of farmland            | Ministry of Education Ecological Field Station for East Asian Migratory Birds |
| Topography        | DEM   | Altitude                            | Geospatial Data Cloud                                                         |
| Human disturbance | RD    | Distance to road                    | OpenStreetMap                                                                 |
|                   | POP   | Distribution of the population      | Resource and Environment Science and Data Center                              |
|                   | CD    | Distance to countryside             | Resource and Environment Science and Data Center                              |
|                   | HF    | Human footprint                     | China Agricultural University                                                 |
