# Supplementary figures and images for: Habitat Suitability and Determinants for Anatidae in Multi-Watershed Composite Wetlands in Anhui, China
Source: MDPI journal article supplement (doi:10.3390/ani14071010), 2024-03-26

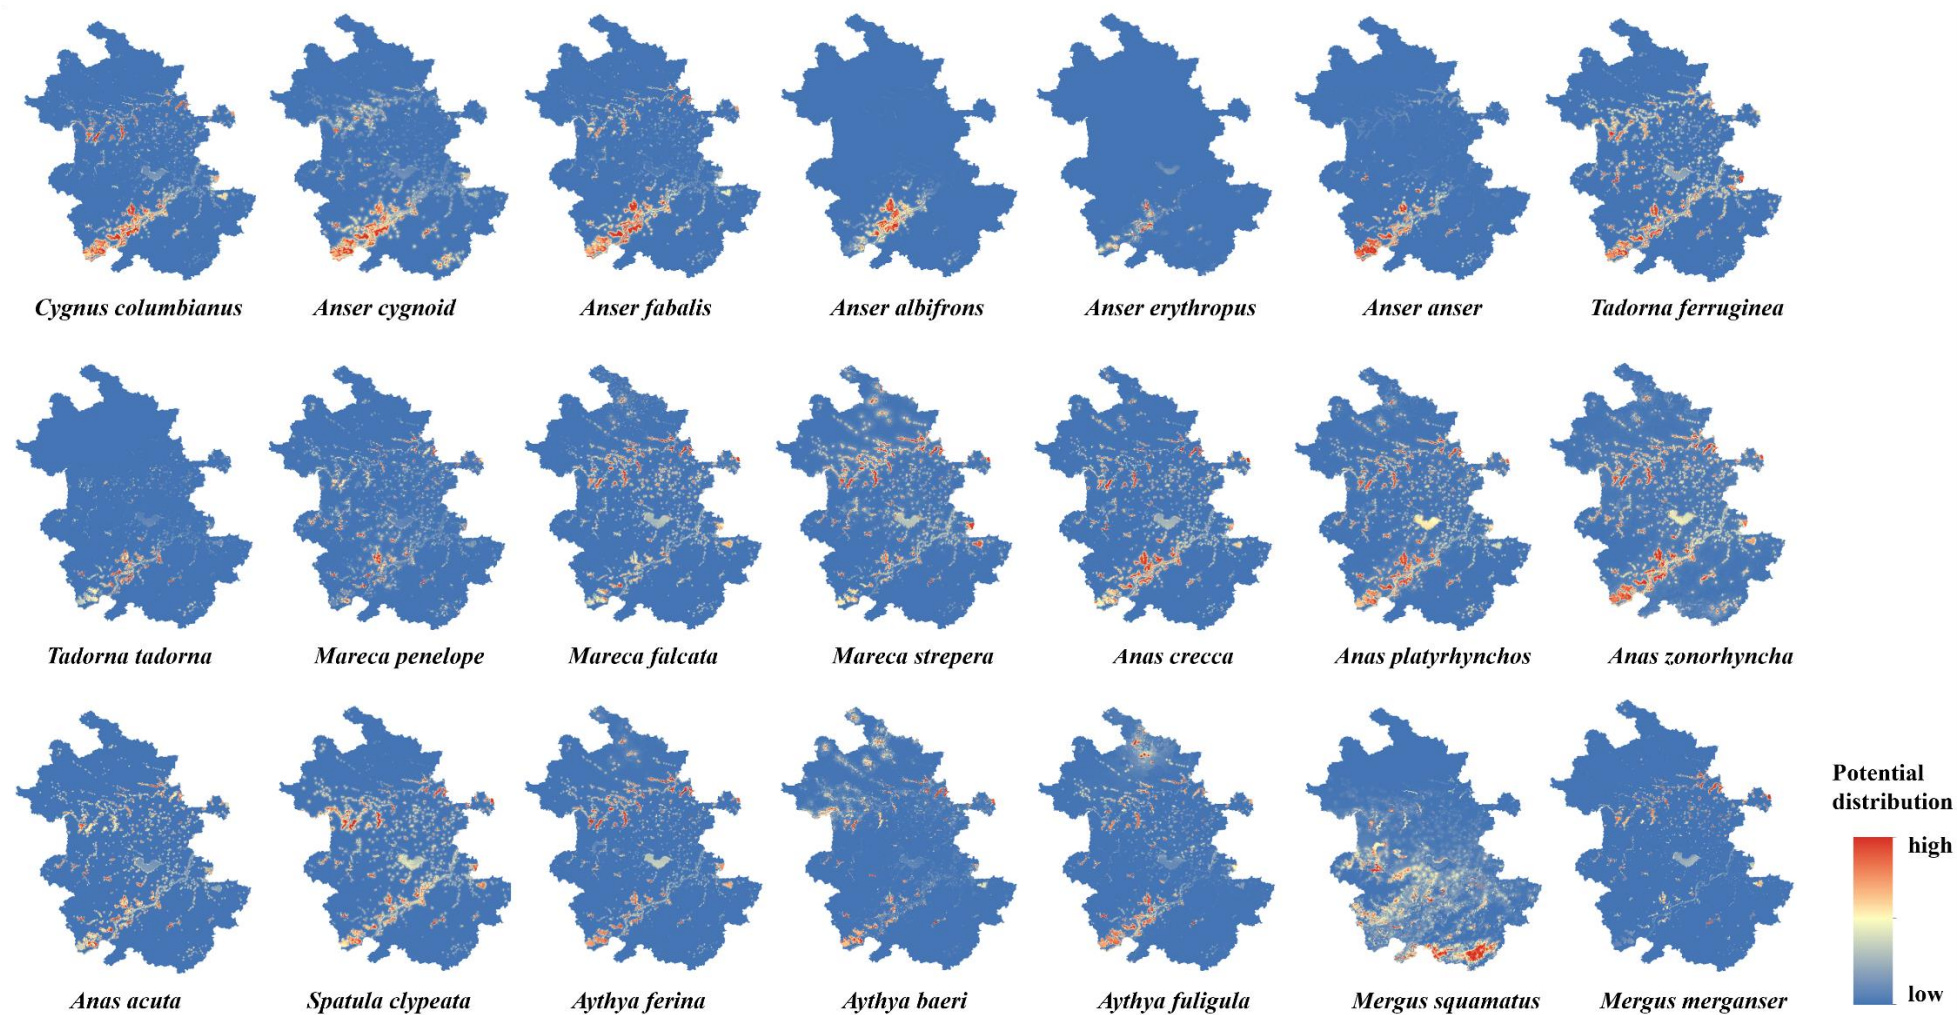

**Figure S2.** Potential distribution for 21 Anatidae species from Maxent models.

Supplement: s1 [file s1]
